# Supplementary material for: Acetyl-CoA synthetase is activated as part of the PDH-bypass in the oleaginous green alga Chlorella desiccata
Source: PubMed Central journal article supplement (PMC4765794; doi:10.1093/jxb/erv424), 2015-09-10
Supplement: supp_erv424_jexbot151381_file001.pdf [file supp_erv424_jexbot151381_file001.pdf]

**Acetyl-CoA synthetase is activated as part of the PDH-bypass in the oleaginous green alga *Chlorella desiccata***

Omri Avidan\* and Uri Pick\*;

**A**

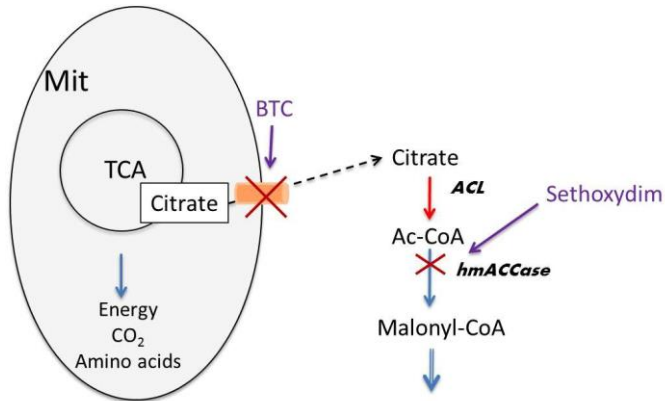

**B**

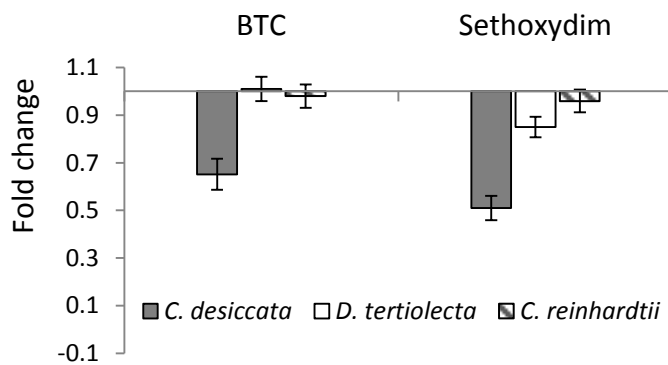

**Supplementary 1:** Effects of citrate efflux and hmACCase inhibitors on TAG level. Cultures of *C. desiccata* and of *D. tertiolecta* were induced in the presence or absence of BTC and sethoxydim. A, schematic illustration of inhibition sites of BTC and sethoxydim. B, relative changes in TAG levels compared to control N deprived cells (means  $\pm$  SD of 3 independent experiments).
